# Supplementary material for: Diagnosis and prognosis are supported by integrated assessment of next-generation sequencing in chronic myeloid malignancies. A real-life study
Source: PubMed Central journal article supplement — Haematologica. 2020 Apr 2;106(3):701–7. doi: 10.3324/haematol.2019.242677 (PMC7927891; doi:10.3324/haematol.2019.242677), 2020-04-02
Supplement: 2019_242677-Disclosures_Contributions.pdf [file 2019_242677-Disclosures_Contributions.pdf]

Haematologica  
HAEMATOL/2019/242677  
Version 3

Diagnosis and prognosis are comforted by integrated assessment of next-generation sequencing in chronic myeloid malignancies. A real-life study.

Sophie Vantyghem, Pierre Peterlin, Sylvain Thépot, Audrey Ménard, Viviane Dubruille, Camille Debord, Thierry Guillaume, Alice Garnier, Amandine Le Bourgeois, Soraya Wullemme, Catherine Godon, Olivier Theisen, Marion Eveillard, Jacques Delaunay, Hervé Maisonneuve, Nadine Morineau, Bruno Villemagne, Stéphane Vigouroux, François Subiger, Elsa Lestang, Marion Loirat, Anne Parcelier, Pascal Godmer, Mélanie Mercier, Adrien Trebouet, Damien Luque Paz, Ronan Le Calloch, Lenaig Le Clech, Céline Bossard, Anne Moreau, Valérie Ugo, Mathilde Hunault, Philippe Moreau, Steven Le Gouill, Patrice Chevallier, Marie C. Béné, and Yannick Le Bris

Disclosures: None of the authors have conflicts of interest to declare relative of this study.

Contributions: PP and LBY conceived the study; VS, PP, BMC and LBY wrote the manuscript; DC, WS, EM, LPD, UV and LBY performed cytological analyses; GC and TO performed cytogenetic analyses; AM and LBY performed molecular analyses; PP, TS, DV, GT, GA, LBA, DJ, MH, MN, VB, VS, LE, LM, PA, GP, MM, LLR, LCL, MP, LGS and PC prescribed NGS analyses in multidisciplinary concertation and collected data from their patients. We thank Laetitia Aubert, Marie-Christine Boursier, Emilie Brangoulou Cécile Girard and Amandine Sebie for excellent technical expertise on molecular analysis.
