# Supplementary material for: Diagnosis and prognosis are supported by integrated assessment of next-generation sequencing in chronic myeloid malignancies. A real-life study
Source: PubMed Central journal article supplement — Haematologica. 2020 Apr 2;106(3):701–7. doi: 10.3324/haematol.2019.242677 (PMC7927891; doi:10.3324/haematol.2019.242677), 2020-04-02
Supplement: 2019_242677_VANTYGHEM_SUPPL.pdf [file 2019_242677_VANTYGHEM_SUPPL.pdf]

## Diagnosis and prognosis are supported by integrated assessment of next-generation sequencing in chronic myeloid malignancies. A real-life study

Sophie Vantyghem,<sup>1</sup> Pierre Peterlin,<sup>1</sup> Sylvain Thépot,<sup>2,3</sup> Audrey Ménard,<sup>4</sup> Viviane Dubruille,<sup>1</sup> Camille Debord,<sup>4</sup> Thierry Guillaume,<sup>1</sup> Alice Garnier,<sup>1</sup> Amandine Le Bourgeois,<sup>1</sup> Soraya Wuilleme,<sup>4</sup> Catherine Godon,<sup>4</sup> Olivier Theisen,<sup>4</sup> Marion Eveillard,<sup>3,4</sup> Jacques Delaunay,<sup>5</sup> Hervé Maisonneuve,<sup>6</sup> Nadine Morineau,<sup>6</sup> Bruno Villemagne,<sup>6</sup> Stéphane Vigouroux,<sup>6</sup> François Subiger,<sup>7</sup> Elsa Lestang,<sup>8</sup> Marion Loirat,<sup>8</sup> Anne Parcelier,<sup>9</sup> Pascal Godmer,<sup>9</sup> Mélanie Mercier,<sup>9</sup> Adrien Trebouet,<sup>10</sup> Damien Luque Paz,<sup>3,11</sup> Ronan Le Calloch,<sup>12</sup> Lenaig Le Clech,<sup>12</sup> Céline Bossard,<sup>13</sup> Anne Moreau,<sup>13</sup> Valérie Ugo,<sup>3,11</sup> Mathilde Hunault,<sup>2,3</sup> Philippe Moreau,<sup>1,3</sup> Steven Le Gouill,<sup>1,3</sup> Patrice Chevallier,<sup>1,3</sup> Marie C. Béné<sup>3,4</sup> and Yannick Le Bris<sup>3,4</sup>

<sup>1</sup>Hematology Clinic, Nantes University Hospital, Nantes; <sup>2</sup>Hematology Clinic, Angers University Hospital, Angers; <sup>3</sup>CRCINA, INSERM, CNRS, Université de Nantes, Université d'Angers, Pays de la Loire; <sup>4</sup>Hematology Biology, Nantes University Hospital, Nantes; <sup>5</sup>Le Confluent, Nantes; <sup>6</sup>Hematology Clinic, Vendée Hospital Center, La Roche sur Yon; <sup>7</sup>Biology Laboratory, Vendée Hospital Center, La Roche sur Yon; <sup>8</sup>Hematology Clinic, Saint Nazaire Hospital, Saint Nazaire; <sup>9</sup>Hematology Clinic, Bretagne Atlantique Hospital, Vannes; <sup>10</sup>Hematology Clinic, Bretagne Sud Hospital, Lorient; <sup>11</sup>Hematology Biology, Angers University Hospital, Angers; <sup>12</sup>Hematology Clinic, Quimper Hospital, Quimper and <sup>13</sup>Pathology Department, Nantes University Hospital, Nantes, France

©2021 Ferrata Storti Foundation. This is an open-access paper. doi:10.3324/haematol.2019.242677

Received: November 12, 2019.

Accepted: April 1, 2020.

Pre-published: April 2, 2020.

Correspondence: YANNICK LE BRIS - yannick.lebris@chu-nantes.fr

Diagnosis and prognosis are comforted by integrated assessment of next-generation sequencing in chronic myeloid malignancies. A real-life study.

Sophie Vantghem, Pierre Pierrin, Sylvain Thépot, Audrey Mérand, Viviane Dubrault, Camille Debon, Thierry Guillaume, Alice Garnier, Amandine Le Bourgeois, Soraya Willems, Catherine Godon, Olivier Theissen, Marion Eveillard, Jacques Delasnay, Hervé Maisonneuve, Nadine Morineau, Bruno Villamagna, Stéphanie Vigouroux, François Subrier, Elsa Lesang, Marion Loize, Anne Parcellier, Pascal Godmer, Mélanie Mercier, Adrien Treboux, Damien Liqueux, Rozan Le Calvez, Léaigh Le Clach, Céline Bossard, Anne Moreau, Valérie Ugo, Mathilde Hensaut, Philippe Moreau, Steven Le Guill, Patrice Chevallier, Marie C Bénel and Yannick Le Bre

Supplemental methods and data

Supplemental Table 1 : Targeted genes panel

| Gene    | Chromosome | Cytoband | Transcript NCBI | Transcript ENSEMBL | Targeted Exons |
|---------|------------|----------|-----------------|--------------------|----------------|
| ASXL1   | 20         | q11.2    | NM_015335.5     | ENST00000176927    | 13-15          |
| BCL6    | X          | Xp11.4   | NM_001123385    | ENST00000378444    | Full CDS       |
| BCL6L1  | X          | Xq25.1   | NM_001047172    | ENST00000181477    | Full CDS       |
| CBF1    | 11         | 11q23.3  | NM_051988.2     | ENST00000264033    | 4-17           |
| CSP3R   | 1          | 1p34.3   | NM_056909       | ENST00000319103    | 8-9            |
| DNMT3A  | 2          | 2p23.3   | NM_175262.1     | ENST00000264709    | Full CDS       |
| ETV6    | 12         | 12p13.2  | NM_001897.4     | ENST0000030273     | Full CDS       |
| ETP2    | 7          | 7q36.1   | NM_004465.4     | ENST00000303256    | 2-6            |
| GATA2   | 3          | 3p21.3   | NM_002358       | ENST00000311106    | 2-6            |
| IKZF1   | 2          | 2q34     | NM_005886.2     | ENST00000345146    | 4              |
| IKZF2   | 15         | 15q26.1  | NM_002186.2     | ENST00000330662    | 2-6            |
| JAK2    | 9          | 9p24.1   | NM_004972.3     | ENST00000381652    | Full CDS       |
| KDM6A   | X          | Xp11.3   | NM_021140       | ENST00000377965    | Full CDS       |
| KIT     | 4          | 4q12     | NM_002022.2     | ENST00000288155    | 9-11/17        |
| KRAS    | 12         | 12p12.1  | NM_004953.3     | ENST0000011936     | 2-4            |
| MPL     | 1          | 1p34.2   | NM_000373.2     | ENST00000374710    | Full CDS       |
| NPM1    | 5          | 5q35.1   | NM_002520.6     | ENST00000269920    | 11             |
| NUP214  | 5          | 5q31.3   | NM_001246208.1  | ENST00000384644    | Full CDS       |
| NRAS    | X          | Xp11.3   | NM_002524.4     | ENST00000389535    | 2-3            |
| PKNOX1  | X          | Xq25.2   | NM_002611       | ENST00000336950    | Full CDS       |
| PPFWD1  | 12         | 12q24.13 | NM_002834       | ENST00000316777    | 2-3            |
| RAG2    | 8          | 8q24.11  | NM_002019.2     | ENST00000370738    | 1-13           |
| RUNX1   | 21         | 21q22.12 | NM_001754.4     | ENST00000437180    | 3-9            |
| SETBP1  | 18         | 18q12.3  | NM_055656.2     | ENST00000200330    | 4              |
| SF3B1   | 2          | 2q31.1   | NM_012433.2     | ENST00000335508    | 13-18          |
| SMDL4   | X          | Xp11.22  | NM_004443.3     | ENST00000322113    | Full CDS       |
| SMC3    | 10         | 10q25.2  | NM_004443.3     | ENST0000031804     | Full CDS       |
| SRSF2   | 17         | 17q12.1  | NM_003016.4     | ENST00000300465    | 1              |
| STAT2   | X          | Xq25     | NM_001247249    | ENST00000218089    | Full CDS       |
| TEF2    | 4          | 4q24     | NM_001127208    | ENST00000380013    | Full CDS       |
| TNFSF10 | 6          | 6q23.3   | NM_001270508    | ENST00000237289    | Full CDS       |
| TNFSF17 | 17         | 17p13.1  | NM_005454.1     | ENST00000389356    | Full CDS       |
| UGAF1   | 21         | 21q22.3  | NM_006758.2     | ENST00000291552    | 2-5/6          |
| ZRSR2   | X          | Xp22.2   | NM_005068.3     | ENST00000307771    | Full CDS       |

CDS: coding DNA segments

Supplemental table 2 : Details of the results of cytogenetic analyses and NGS sequencing and their indications.

| UPN | Pathology | Group A | Group B | Karyotype results                           | Genes                                                                    | c.                                                                                                                          | t. | p.                                                                                                                               | NAF (%)                                         | VS gene f        | p.                       | p.                          | NAF (%)      |      |
|-----|-----------|---------|---------|---------------------------------------------|--------------------------------------------------------------------------|-----------------------------------------------------------------------------------------------------------------------------|----|----------------------------------------------------------------------------------------------------------------------------------|-------------------------------------------------|------------------|--------------------------|-----------------------------|--------------|------|
| F1  | MDS       | 1       | 0       | 46,XX[20]                                   |                                                                          |                                                                                                                             |    |                                                                                                                                  |                                                 |                  |                          |                             |              |      |
| F2  | MDS/MPN   | 0       | 1       | 46,XY[20]                                   | ASXL1<br>RUNX1                                                           | c.1900_1922del<br>c.314A>G                                                                                                  |    | p.Glu45Asp+15<br>p.His105Arg                                                                                                     | 18%<br>26%                                      |                  |                          |                             |              |      |
| F3  | MDS       | 0       | 1       | culture failure                             | TP53<br>JAK2<br>DNMT3A<br>TEF2                                           | c.464C>T<br>c.1849G>T<br>c.2855G>A<br>c.5248delG                                                                            |    | p.Pro132Ser<br>p.Val817Phe<br>p.Arg620His<br>p.Asp1750Thr+13                                                                     | 2%<br>44%<br>4%<br>2%                           |                  |                          |                             |              |      |
| F4  | MDS/MPN   | 0       | 1       | 47,XY,+8[246,X(1)8]                         | ASXL1<br>TEF2<br>UGAF1<br>TP53<br>CBF1<br>EP30<br>E2F8<br>JAK2<br>SETBP1 | c.1809G>T<br>c.1988_1994delinsGTTT<br>c.479A>G<br>c.745G>A<br>c.1268G>T<br>c.2098C>T<br>c.2000C>T<br>c.1849G>T<br>c.5202G>A |    | p.Glu537*<br>p.Phe620Leu+17<br>p.Gln137Arg<br>p.Arg380His<br>p.Arg607*<br>p.Arg60Cys<br>p.Arg64Cys<br>p.Val817Phe<br>p.Arg654Asn | 44%<br>27%<br>44%<br>4%<br>2%<br>2%<br>1%<br>2% |                  |                          |                             |              |      |
| F5  | MDS       | 0       | 1       | 46,XX[20]                                   | TP53<br>SF3B1<br>ASXL1                                                   | c.711G>A<br>c.1774G>A<br>c.1934del                                                                                          |    | p.Met237Ile<br>p.Glu52Lys<br>p.Gly487Phe+12                                                                                      | 34%<br>30%<br>27%                               |                  |                          |                             |              |      |
| F6  | MDS       | 1       | 0       | unrealized (thrombocytosis context)         | DNMT3A<br>MPL                                                            | c.1570G>A<br>c.1544G>T                                                                                                      |    | p.Cys581Tyr<br>p.Tyr515Leu                                                                                                       | 47%<br>6%                                       |                  |                          |                             |              |      |
| F7  | MDS       | 0       | 1       | 46,XX[20]                                   | JAK2                                                                     | c.1849G>T                                                                                                                   |    | p.Val817Phe                                                                                                                      | 43%                                             |                  |                          |                             |              |      |
| F8  | MDS/MPN   | 0       | 1       | 47,XY,+8[846,XY,+del(1)(p24-q3)(8)(45XY)[4] | SF3B1<br>JAK2                                                            | c.1866G>C<br>c.1849G>T                                                                                                      |    | p.Glu222Asp<br>p.Val817Phe                                                                                                       | 26%<br>12%                                      |                  |                          |                             |              |      |
| F9  | MDS/MPN   | 1       | 0       | 46,XX[20]                                   | DNMT3A                                                                   | c.1544G>T                                                                                                                   |    | p.Val817Phe                                                                                                                      | 50%                                             | JAK2             | c.3323A>G                | p.Asn1108Ser                | 50%          |      |
| F10 | MDS       | 0       | 1       | 46,XY[20]                                   | SRSF2<br>TEF2<br>DNMT3A<br>KMT6A                                         | c.284C>T<br>c.3873G>A<br>c.2796_2798dup<br>c.163A>G                                                                         |    | p.Pro308His<br>p.Tyr1291*<br>p.Gln533_368del+18p<br>p.Ser15Arg                                                                   | 26%<br>27%<br>29%<br>2%                         |                  |                          |                             |              |      |
| F11 | MDS       | 1       | 1       | unrealized (thrombocytosis context)         |                                                                          |                                                                                                                             |    |                                                                                                                                  |                                                 |                  | JAK2                     | c.3323A>G                   | p.Asn1108Ser | 50%  |
| F12 | MDS       | 0       | 1       | 46,XY[20]                                   | DNMT3A                                                                   | c.1253G>A                                                                                                                   |    | p.Gly418Asp                                                                                                                      | 15%                                             |                  | JAK2                     | c.3323A>G                   | p.Asn1108Ser | 50%  |
| F13 | MDS       | 0       | 1       | 46,XY,del(20)(q11q13)(9)(45,XY[17])         | JAK2<br>ASXL1<br>UGAF1<br>TEF2<br>MPL                                    | c.1849G>T<br>c.1934del<br>c.1270del<br>c.111<br>c.1771T>G                                                                   |    | p.Val817Phe<br>p.Gly487Phe+12<br>p.Gln137Arg<br>p.Ser444Asp+3<br>p.Tyr581Asp                                                     | 22%<br>11%<br>4%<br>2%                          |                  |                          |                             |              |      |
| F14 | MDS       | 1       | 0       | 46,XY[20]                                   |                                                                          |                                                                                                                             |    |                                                                                                                                  |                                                 |                  |                          |                             |              |      |
| F15 | Cytopenia | 1       | 0       | 46,XY[20]                                   | ASXL1                                                                    | c.1934del                                                                                                                   |    | p.Gly487Phe+12                                                                                                                   | 18%                                             |                  |                          |                             |              |      |
| F16 | MDS       | 0       | 1       | 46,XY[20]                                   | ASXL1<br>ASXL1                                                           | c.2407C>T<br>c.1772del                                                                                                      |    | p.Gln803*<br>p.Tyr581*                                                                                                           | 23%<br>6%                                       |                  |                          |                             |              |      |
| F17 | MDS       | 0       | 1       | unrealized (unassprable marrow)             | TEF2                                                                     | c.1660del                                                                                                                   |    | p.Thr556Asn+11                                                                                                                   | 35%                                             |                  |                          |                             |              |      |
| F18 | MDS       | 0       | 1       | 46,XY[26]                                   |                                                                          |                                                                                                                             |    |                                                                                                                                  |                                                 |                  |                          |                             |              |      |
| F19 | MDS       | 0       | 1       | 46,XY[20]                                   | TP53<br>SF3B1<br>DNMT3A<br>SRSF2<br>MPL                                  | c.817C>T<br>c.844C>T<br>c.1934del<br>c.284C>T<br>c.345C>G                                                                   |    | p.Arg273Cys<br>p.Arg287Tyr<br>p.Arg1408His<br>p.Phe65Leu<br>p.Gly12Arg                                                           | 6%<br>2%<br>21%<br>21%<br>4%                    |                  |                          |                             |              |      |
| F20 | MDS       | 0       | 1       | 45,X,-X[18],46,XX[20]                       | TEF2<br>TEF2<br>ZRSR2<br>ZRSR2                                           | c.4100C>T<br>c.3594G>A<br>c.985G>T<br>c.985G>T                                                                              |    | p.Pro136Leu<br>p.7<br>p.Cys129Phe<br>p.Arg269*                                                                                   | 14%<br>11%<br>13%<br>2%                         |                  |                          |                             |              |      |
| F21 | MDS       | 0       | 1       | culture failure                             | TEF2                                                                     | c.39561G>A                                                                                                                  |    | p.7                                                                                                                              | 3%                                              |                  |                          |                             |              |      |
| F22 | MDS       | 0       | 1       | 46,XX[20]                                   | IKZF1                                                                    | c.394C>T                                                                                                                    |    | p.R132C                                                                                                                          | 4%                                              |                  |                          |                             |              |      |
| F23 | AcuteMDS  | 0       | 1       | 46,XY[20]                                   |                                                                          |                                                                                                                             |    |                                                                                                                                  |                                                 |                  |                          |                             |              |      |
| F24 | AcuteMDS  | 1       | 1       | 46,XY[20]                                   | TP53                                                                     | c.668del                                                                                                                    |    | p.Pro223Leu+24                                                                                                                   | 2%                                              | SETBP1           | c.2117A>G                | p.Glu706Gly                 | 45%          |      |
| F25 | MDS       | 0       | 1       | unrealized (unassprable marrow)             | ASXL1<br>ASXL1                                                           | c.2583dup<br>c.2555_2558delG                                                                                                |    | p.Phe822Leu+2<br>p.Asn648Asp+9                                                                                                   | 58%<br>12%                                      |                  |                          |                             |              |      |
| F26 | MDS/MPN   | 1       | 1       | 46,XX[20]                                   | TEF2<br>TEF2                                                             | c.3863G>A<br>c.2081_2082dup                                                                                                 |    | p.Gly1288Asp<br>p.Met695Leu+9                                                                                                    | 26%<br>26%                                      |                  |                          |                             |              |      |
| F27 | MDS/MPN   | 1       | 1       | 46,XY,del(20)(q11q13)[20]                   | ASXL1<br>SRSF2<br>TEF2<br>TEF2                                           | c.2254dup<br>c.290C>G<br>c.670C>T<br>c.1633C>T                                                                              |    | p.Ala753Gly+22<br>p.Pro308His<br>p.Gln341*<br>p.Arg544*                                                                          | 6%<br>48%<br>46%<br>42%                         |                  |                          |                             |              |      |
| F28 | MDS       | 0       | 1       | 46,XY[20]                                   | TEF2<br>TEF2                                                             | c.4240_4244del<br>c.4781C>G                                                                                                 |    | p.Gln1414Ser+10<br>p.Ser1589*                                                                                                    | 52%<br>44%                                      | SETBP1<br>ZRSR2  | c.851T>C<br>c.1482C>G    | p.Leu284Pro<br>p.Arg98Gly   | 83%<br>50%   |      |
| F29 | MDS/MPN   | 0       | 1       | 46,XY[20]                                   | TEF2<br>TEF2<br>SF3B1<br>MPL                                             | c.978G>A<br>c.688G>A<br>c.208A>G<br>c.352A>A                                                                                |    | p.Tyr1259*<br>p.Ser188Tyr<br>p.Lys700Gln<br>p.Gly13Asp                                                                           | 36%<br>40%<br>33%<br>2%                         |                  |                          |                             |              |      |
| F30 | MDS       | 0       | 1       | 46,XX,der(1)(3)(p11q11)[99],46,XX[11]       | JAK2                                                                     | c.1849G>T                                                                                                                   |    | p.Val817Phe                                                                                                                      | 85%                                             |                  |                          |                             |              |      |
| F31 | MDS       | 0       | 1       | unrealized (unassprable marrow)             | ZRSR2<br>CBF1                                                            | c.1545del<br>c.1511G>A                                                                                                      |    | p.Ser368Leu+7<br>p.Val64Tyr*                                                                                                     | 41%<br>15%                                      |                  |                          |                             |              |      |
| F32 | MDS/MPN   | 0       | 1       | 46,XY[20]                                   | ASXL1<br>RUNX1<br>SRSF2<br>TEF2                                          | c.1934del<br>c.1167dup<br>c.283C>G<br>c.454G>T                                                                              |    | p.Gly487Phe+12<br>p.Gln390Asp+210<br>p.Pro308His<br>p.Arg1518*                                                                   | 18%<br>43%<br>37%<br>48%<br>27%                 |                  |                          |                             |              |      |
| F33 | MDS       | 1       | 0       | 46,XX[20]                                   |                                                                          |                                                                                                                             |    |                                                                                                                                  |                                                 |                  | BCL2L1                   | c.1834G>A                   | p.Ala121Thr  |      |
| F34 | MDS       | 1       | 0       | unrealized (thrombocytosis context)         | MPL<br>SF3B1<br>SF3B1<br>SF3B1                                           | c.1544G>C<br>c.2342G>C<br>c.1890G>C<br>c.1866G>C                                                                            |    | p.Tyr155Ser<br>p.Asp791Gly<br>p.Val65Asn<br>p.Glu222Asp                                                                          | 7%<br>13%<br>14%<br>8%                          | RAD21            | c.1289A>C                | p.Gln430Pro                 | 46%          |      |
| F35 | MDS       | 1       | 0       | unrealized (polycythemia vera suspicion)    |                                                                          |                                                                                                                             |    |                                                                                                                                  |                                                 |                  |                          |                             |              |      |
| F36 | Cytopenia | 1       | 0       | 46,XX[20]                                   |                                                                          |                                                                                                                             |    |                                                                                                                                  |                                                 |                  |                          |                             |              |      |
| F37 | MDS       | 1       | 0       | unrealized (thrombocytosis context)         | MPL<br>ASXL1<br>TEF2                                                     | c.1544G>T<br>c.1772dup<br>c.407G>T                                                                                          |    | p.Tyr515Leu<br>p.Tyr581*<br>p.Asp1560Cys                                                                                         | 3%<br>36%<br>8%                                 |                  |                          |                             |              |      |
| F38 | MDS       | 0       | 1       | 46,XY[20]                                   | TEF2<br>DNMT3A                                                           | c.1865C>T<br>c.2448C>T                                                                                                      |    | p.Gln647*<br>p.Gln1816*                                                                                                          | 59%<br>34%                                      | SRSF2            | c.238_240dup             | p.Leu80dup                  | 85%          |      |
| F39 | MDS       | 1       | 0       | 46,XY[20]                                   |                                                                          |                                                                                                                             |    |                                                                                                                                  |                                                 |                  |                          |                             |              |      |
| F40 | MDS       | 0       | 1       | 46,XY,(1-19)(p22,q24)(8)                    | ASXL1                                                                    | c.1871delT                                                                                                                  |    | p.Arg23Phe+10                                                                                                                    | 28%                                             |                  | BCL2L1                   | c.3548G>A                   | p.Arg1183Gln | 100% |
| F41 | MDS/MPN   | 1       | 0       | 46,XY[20]                                   | ASXL1<br>SETBP1<br>SRSF2<br>TEF2<br>PPFWD1<br>MPL                        | c.2302C>T<br>c.2088G>A<br>c.284C>A<br>c.3778del<br>c.1056G>T<br>c.352A>A                                                    |    | p.Gln768*<br>p.Gln768*<br>p.Pro308His<br>p.His1055Asp+14<br>p.Ser502Leu<br>p.Gly12Arg                                            | 47%<br>20%<br>53%<br>46%<br>4%<br>2%            |                  |                          |                             |              |      |
| F42 | MDS/MPN   | 0       | 1       | 46,XX[20]                                   | ASXL1<br>TEF2<br>TEF2                                                    | c.2783del<br>c.2913G>G<br>c.5127T>A                                                                                         |    | p.Val922Leu+23<br>p.Arg1811Gly<br>p.Cys1709*                                                                                     | 12%<br>20%<br>32%                               | SETBP1<br>KDM6A  | c.1276G>A<br>c.3337G>A   | p.Ala428Thr<br>p.Val1113Ile | 50%<br>51%   |      |
| F43 | MDS       | 1       | 0       | 46,XX[20]                                   |                                                                          |                                                                                                                             |    |                                                                                                                                  |                                                 |                  |                          |                             |              |      |
| F44 | MDS       | 1       | 0       | unrealized (thrombocytosis context)         | MPL<br>MPL                                                               | c.1495delCAspGT<br>c.1544G>T                                                                                                |    | p.His491Val+46<br>p.Tyr515Leu                                                                                                    | 5%<br>4%                                        |                  |                          |                             |              |      |
| F45 | MDS       | 1       | 0       | 46,XX[20]                                   |                                                                          |                                                                                                                             |    |                                                                                                                                  |                                                 |                  |                          |                             |              |      |
| F46 | MDS       | 1       | 0       | 46,XX[20]                                   |                                                                          |                                                                                                                             |    |                                                                                                                                  |                                                 |                  |                          |                             |              |      |
| F47 | MDS       | 1       | 0       | unrealized (polycythemia vera suspicion)    |                                                                          |                                                                                                                             |    |                                                                                                                                  |                                                 |                  |                          |                             |              |      |
| F48 | MDS       | 1       | 0       | 46,XY[20]                                   | JAK2                                                                     | c.1849G>T                                                                                                                   |    | p.Val817Phe                                                                                                                      | 1%                                              | NO7CH1<br>DNMT3A | c.5248G>A<br>c.1555-3T>A | p.Val1750Met<br>p.7         | 55%<br>8%    |      |
